# Supplementary material
Source: PubMed Central journal article supplement (PMC1479549)
Supplement: 7400667-s1.pdf [file 7400667-s1.pdf]

**Supplementary Table 1: Pathologies detected in successive generations of telomerase-deficient mice \*.**

Successive generations (G1-G3) of telomerase-deficient (*Terc*(-/-)) male (M) and female (F) mice, either wild type for p53 (*p53*(+/+)) or carrying an extra copy of p53 (*p53*(+/+; *tg*/)) were sacrificed when they showed signs of poor health, such as reduced activity or dramatic weight loss, and subjected to histopathological analysis. The total number of animals (n) followed up within each mouse cohort is given in the header of the table. \* Neoplasias are listed separately in Supplementary Table 2.

| organ  | pathology                 | genotype                                                   |                                                                         |                                                             |                                                                          |                                                              |                                                                            |                                                              |                                                                           |
|--------|---------------------------|------------------------------------------------------------|-------------------------------------------------------------------------|-------------------------------------------------------------|--------------------------------------------------------------------------|--------------------------------------------------------------|----------------------------------------------------------------------------|--------------------------------------------------------------|---------------------------------------------------------------------------|
|        |                           | <i>Terc</i> (+/+)<br><i>p53</i> (+/+)<br>n=32<br>(18M/14F) | <i>Terc</i> (+/+)<br><i>p53</i> (+/+; <i>tg</i> /)<br>n=65<br>(29M/37F) | G1- <i>Terc</i> (-/-)<br><i>p53</i> (+/+)<br>n=9<br>(4M/5F) | G1- <i>Terc</i> (-/-)<br><i>p53</i> (+/+; <i>tg</i> /)<br>n=9<br>(5M/4F) | G2- <i>Terc</i> (-/-)<br><i>p53</i> (+/+)<br>n=15<br>(8M/7F) | G2- <i>Terc</i> (-/-)<br><i>p53</i> (+/+; <i>tg</i> /)<br>n=15<br>(11M/4F) | G3- <i>Terc</i> (-/-)<br><i>p53</i> (+/+)<br>n=12<br>(6M/6F) | G3- <i>Terc</i> (-/-)<br><i>p53</i> (+/+; <i>tg</i> /)<br>n=14<br>(9M/5F) |
| skin   | hyperplasia               | 0/32 (0%)                                                  | 2/65 (3%)                                                               | 1/9 (11%)                                                   | 1/9 (11%)                                                                | 0/15 (0%)                                                    | 0/15 (0%)                                                                  | 0/12 (0%)                                                    | 0/14 (0%)                                                                 |
|        | chronic dermatitis        | 3/32 (9%)                                                  | 6/65 (9%)                                                               | 0/9 (0%)                                                    | 1/9 (11%)                                                                | 1/15 (7%)                                                    | 1/15 (7%)                                                                  | 0/12 (0%)                                                    | 1/14 (7%)                                                                 |
|        | chronic blefaritis        | 1/32 (3%)                                                  | 1/65 (2%)                                                               | 0/9 (0%)                                                    | 0/9 (0%)                                                                 | 0/15 (0%)                                                    | 0/15 (0%)                                                                  | 0/12 (0%)                                                    | 1/14 (7%)                                                                 |
| brain  | hydrocephalus             | 0/32 (0%)                                                  | 0/65 (0%)                                                               | 1/9 (11%)                                                   | 0/9 (0%)                                                                 | 0/15 (0%)                                                    | 0/15 (0%)                                                                  | 0/12 (0%)                                                    | 0/14 (0%)                                                                 |
|        | calcification in thalamus | 3/32 (9%)                                                  | 0/65 (0%)                                                               | 0/9 (0%)                                                    | 0/9 (0%)                                                                 | 0/15 (0%)                                                    | 0/15 (0%)                                                                  | 1/12 (8%)                                                    | 0/14 (0%)                                                                 |
| lung   | thrombosis                | 0/32 (0%)                                                  | 0/65 (0%)                                                               | 0/9 (0%)                                                    | 1/9 (11%)                                                                | 0/15 (0%)                                                    | 0/15 (0%)                                                                  | 0/12 (0%)                                                    | 0/14 (0%)                                                                 |
|        | lymphoid infiltration     | 4/32 (13%)                                                 | 3/65 (5%)                                                               | 1/9 (11%)                                                   | 1/9 (11%)                                                                | 0/15 (0%)                                                    | 0/15 (0%)                                                                  | 0/12 (0%)                                                    | 0/14 (0%)                                                                 |
| liver  | vacuolar degeneration     | 0/32 (0%)                                                  | 1/65 (2%)                                                               | 0/9 (0%)                                                    | 0/9 (0%)                                                                 | 0/15 (0%)                                                    | 1/15 (7%)                                                                  | 1/12 (8%)                                                    | 0/14 (0%)                                                                 |
|        | microgranuloma            | 1/32 (3%)                                                  | 6/65 (9%)                                                               | 2/9 (22%)                                                   | 0/9 (0%)                                                                 | 0/15 (0%)                                                    | 1/15 (7%)                                                                  | 0/12 (0%)                                                    | 0/14 (0%)                                                                 |
|        | hepatitis                 | 0/32 (0%)                                                  | 2/65 (3%)                                                               | 0/9 (0%)                                                    | 0/9 (0%)                                                                 | 0/15 (0%)                                                    | 1/15 (7%)                                                                  | 1/12 (8%)                                                    | 1/14 (7%)                                                                 |
|        | cysts                     | 1/32 (3%)                                                  | 2/65 (3%)                                                               | 0/9 (0%)                                                    | 0/9 (0%)                                                                 | 2/15 (13%)                                                   | 0/15 (0%)                                                                  | 1/12 (8%)                                                    | 0/14 (0%)                                                                 |
| kidney | glomerulonephritis        | 10/32 (31%)                                                | 36/65 (55%)                                                             | 4/9 (44%)                                                   | 2/9 (22%)                                                                | 1/15 (7%)                                                    | 0/15 (0%)                                                                  | 0/12 (0%)                                                    | 0/14 (0%)                                                                 |
|        | tubular degeneration      | 1/32 (3%)                                                  | 7/65 (11%)                                                              | 1/9 (11%)                                                   | 0/9 (0%)                                                                 | 1/15 (7%)                                                    | 1/15 (7%)                                                                  | 0/12 (0%)                                                    | 1/14 (7%)                                                                 |
|        | lymphoid infiltration     | 10/32 (31%)                                                | 18/65 (28%)                                                             | 3/9 (33%)                                                   | 4/9 (44%)                                                                | 1/15 (7%)                                                    | 1/15 (7%)                                                                  | 1/12 (8%)                                                    | 0/14 (0%)                                                                 |
|        | cysts                     | 4/32 (13%)                                                 | 8/65 (12%)                                                              | 3/9 (33%)                                                   | 1/9 (11%)                                                                | 1/15 (7%)                                                    | 0/15 (0%)                                                                  | 0/12 (0%)                                                    | 0/14 (0%)                                                                 |
|        | adrenal hyperplasia       | 0/32 (0%)                                                  | 0/65 (0%)                                                               | 0/9 (0%)                                                    | 0/9 (0%)                                                                 | 1/15 (7%)                                                    | 0/15 (0%)                                                                  | 0/12 (0%)                                                    | 1/14 (7%)                                                                 |

|                  |                             |             |             |           |           |             |             |             |             |
|------------------|-----------------------------|-------------|-------------|-----------|-----------|-------------|-------------|-------------|-------------|
| spleen           | hemosiderosis               | 4/32 (13%)  | 8/65 (12%)  | 2/9 (22%) | 2/9 (22%) | 2/15 (13%)  | 0/15 (0%)   | 1/12 (8%)   | 0/14 (0%)   |
|                  | lymphoid hyperplasia        | 8/32 (25%)  | 7/65 (11%)  | 3/9 (33%) | 0/9 (0%)  | 3/15 (20%)  | 4/15 (27%)  | 2/12 (17%)  | 2/14 (14%)  |
|                  | atypic lymphoid hyperplasia | 0/32 (0%)   | 3/65 (5%)   | 1/9 (11%) | 0/9 (0%)  | 0/15 (0%)   | 0/15 (0%)   | 0/12 (0%)   | 1/14 (7%)   |
|                  | amyloidosis                 | 1/32 (3%)   | 3/65 (5%)   | 0/9 (0%)  | 0/9 (0%)  | 1/15 (7%)   | 0/15 (0%)   | 0/12 (0%)   | 0/14 (0%)   |
|                  | atrophy                     | 5/32 (16%)  | 11/65 (17%) | 3/9 (33%) | 1/9 (11%) | 4/15 (27%)  | 4/15 (27%)  | 5/12 (42%)  | 3/14 (21%)  |
| gut              | hyperplasia                 | 0/32 (0%)   | 0/65 (0%)   | 0/9 (0%)  | 0/9 (0%)  | 1/15 (7%)   | 1/15 (7%)   | 0/12 (0%)   | 0/14 (0%)   |
| intestine        | atrophy                     | 0/32 (0%)   | 0/65 (0%)   | 7/9 (78%) | 5/9 (56%) | 13/15 (87%) | 13/15 (87%) | 10/12 (83%) | 12/14 (86%) |
|                  | hemorrhagia                 | 0/32 (0%)   | 2/65 (3%)   | 1/9 (11%) | 0/9 (0%)  | 1/15 (7%)   | 0/15 (0%)   | 0/12 (0%)   | 0/14 (0%)   |
|                  | peritonitis                 | 1/32 (3%)   | 0/65 (0%)   | 1/9 (11%) | 0/9 (0%)  | 0/15 (0%)   | 0/15 (0%)   | 0/12 (0%)   | 0/14 (0%)   |
|                  | enteritis                   | 1/32 (3%)   | 2/65 (3%)   | 0/9 (0%)  | 0/9 (0%)  | 0/15 (0%)   | 0/15 (0%)   | 0/12 (0%)   | 1/14 (7%)   |
| bladder          | cystitis                    | 0/32 (0%)   | 0/65 (0%)   | 0/9 (0%)  | 0/9 (0%)  | 0/15 (0%)   | 0/15 (0%)   | 1/12 (8%)   | 0/14 (0%)   |
| lymph nodes      | hyperplasia                 | 0/32 (0%)   | 1/65 (2%)   | 0/9 (0%)  | 0/9 (0%)  | 0/15 (0%)   | 1/15 (7%)   | 0/12 (0%)   | 0/14 (0%)   |
| testis           | hyperplasia of Leydig cells | 0/18 (0%)   | 0/29 (0%)   | 0/4 (0%)  | 1/5 (20%) | 0/8 (0%)    | 0/11 (0%)   | 2/6 (33%)   | 0/9 (0%)    |
|                  | atrophy                     | 0/18 (0%)   | 5/29 (17%)  | 2/4 (50%) | 4/5 (80%) | 6/8 (75%)   | 8/11 (73%)  | 5/6 (83%)   | 6/9 (67%)   |
| seminal vesicles | dilatation                  | 10/18 (56%) | 11/29 (38%) | 0/4 (0%)  | 2/5 (40%) | 0/8 (0%)    | 0/11 (0%)   | 0/6 (0%)    | 0/9 (0%)    |
| uterus           | endometrial hyperplasia     | 5/14 (36%)  | 13/37 (35%) | 0/5 (0%)  | 0/4 (0%)  | 1/7 (14%)   | 1/4 (25%)   | 0/6 (0%)    | 0/5 (0%)    |
|                  | urethritis                  | 0/14 (0%)   | 0/37 (0%)   | 0/5 (0%)  | 0/4 (0%)  | 0/7 (0%)    | 0/4 (0%)    | 1/6 (17%)   | 0/5 (0%)    |
| ovary            | atrophy                     | 0/14 (0%)   | 7/37 (19%)  | 1/5 (20%) | 0/4 (0%)  | 1/7 (14%)   | 0/4 (0%)    | 1/6 (17%)   | 2/5 (40%)   |
|                  | cyst                        | 2/14 (14%)  | 1/37 (3%)   | 0/5 (0%)  | 0/4 (0%)  | 1/7 (14%)   | 0/4 (0%)    | 0/6 (0%)    | 0/5 (0%)    |

---

**Supplementary Table 2: Tumor spectrum of wild-type and super-p53 mice proficient or null for telomerase.**

Wild-type (Terc(+/+)) and successive generations (G1, G2 and G3) of telomerase-deficient (Terc(-/-) male (M) and female (F) mice, either wild type for p53 (p53(+/+)) or carrying an extra copy of p53 (p53(+/+; tg/)) were sacrificed when they showed signs of poor health, such as reduced activity or dramatic weight loss, and analyzed for neoplastic lesions. The total number of animals (n) followed up within each mouse cohort is given in the header of the table.

|                              | genotype                   |                                 |                            |                                 |
|------------------------------|----------------------------|---------------------------------|----------------------------|---------------------------------|
|                              | Terc(+/+)                  |                                 | G1,G2 and G3 Terc(-/-)     |                                 |
|                              | p53(+/+)<br>n=32 (18M/14F) | p53(+/+; tg/)<br>n=65 (29M/37F) | p53(+/+)<br>n=36 (18M/18F) | p53(+/+; tg/)<br>n=38 (25M/13F) |
| <b>malignant tumors:</b>     |                            |                                 |                            |                                 |
| lymphomas                    | 13/32 (41%)                | 14/65 (22%) *                   | 2/36 (6%)                  | 3/38 (8%)                       |
| histiocytic sarcomas         | 4/32 (13%)                 | 8/65 (12%)                      | 0/36 (0%)                  | 1/38 (3%)                       |
| hemangiosarcomas             | 2/32 (6%)                  | 1/65 (2%)                       | 0/36 (0%)                  | 0/38 (0%)                       |
| carcinomas                   | 0/32 (0%)                  | 2/65 (3%)                       | 0/36 (0%)                  | 0/38 (0%)                       |
| <i>total :</i>               | 19/32 (59%)                | 25/65 (38%) *                   | 2/36 (6%)                  | 4/38 (11%)                      |
| <b>non-malignant tumors:</b> |                            |                                 |                            |                                 |
| adenomas                     | 5/32 (16%)                 | 18/65 (28%)                     | 2/36 (6%)                  | 2/38 (5%)                       |
| hemangiomas                  | 1/32 (3%)                  | 1/65 (2%)                       | 0/36 (0%)                  | 1/38 (3%)                       |
| others                       | 2/32 (6%)                  | 2/65 (3%)                       | 0/36 (0%)                  | 0/38 (0%)                       |

\* p < 0.05 *versus* wild type controls (Fisher's Exact test)
